# Supplementary material
Source: publisher figshare collection journal article supplement (https://acs.figshare.com/ndownloader/files/27479299)
Supplement: Supplementary file 1 [file 27479299]

# Supporting Information

## Tracking SARS-CoV-2 RNA through the wastewater treatment process

Hala Abu-Ali<sup>1§</sup>, Karin Yaniv<sup>2§</sup>, Edo Bar-Zeev<sup>1</sup>, Sanhita Chaudhury<sup>1</sup>, Satish Lakkakula<sup>2</sup>, Zeev Ronen<sup>1</sup>, Ariel Kushmaro<sup>2\*</sup> and Oded Nir<sup>1\*</sup>

<sup>1</sup>Blaustein Institutes for Desert Research, Zuckerberg Institute for Water Research, Ben-Gurion University of the Negev, Sede Boqer Campus 8499000, Israel

<sup>2</sup>Department of Biotechnology Engineering, Ben-Gurion University of the Negev, Beer-Sheva 8410501, Israel

\* Corresponding authors E-mail:

A. Kushmaro [arielkus@bgu.ac.il](mailto:arielkus@bgu.ac.il)

O. Nir [odni@bgu.ac.il](mailto:odni@bgu.ac.il)

*§H.A. and K.Y contributed equally to this paper*

### Contents

#### Topic

- A. Chemicals and materials
- B. Target WWTPs
- C. Sample processing
  - A. Sewage sampling and concentration
  - B. Quantification of SARS-CoV using calibration curves
- D. References

## A. Chemicals and materials

All chemicals and reagents, unless specified otherwise, were of analytical grade. Milli-Q grade deionized water (18 M $\Omega$ -cm) was used wherever needed. FX100 dialysers (Fresenius Medical Care, Bud Hamburg, Germany) with an effective surface area of 2.2 m<sup>2</sup>, ultrafiltration coefficient of 73 mL·h<sup>-1</sup>·mmHg<sup>-1</sup> and pore size of 3.3 nm<sup>1,2</sup> were used for sample concentration in this study. Phosphate Buffered Saline (PBS) was prepared using phosphate buffered saline tablets purchased from Sigma-Aldrich-Merck, Israel, Commercial 10% w/w sodium hypochlorite (NaOCl) solution, used for sterilization, and ethanol (99.99%) were purchased from Romical chemicals and laboratory equipment.

## B. Target wastewater treatment plants (WWTP)

The COVID-19 active cases in the target WWTPs (Figure S1) (Shoket WWTP in Hura and Sorek WWTP in Jerusalem) and the basic physical properties of the collected WW (Table S1) are given below.

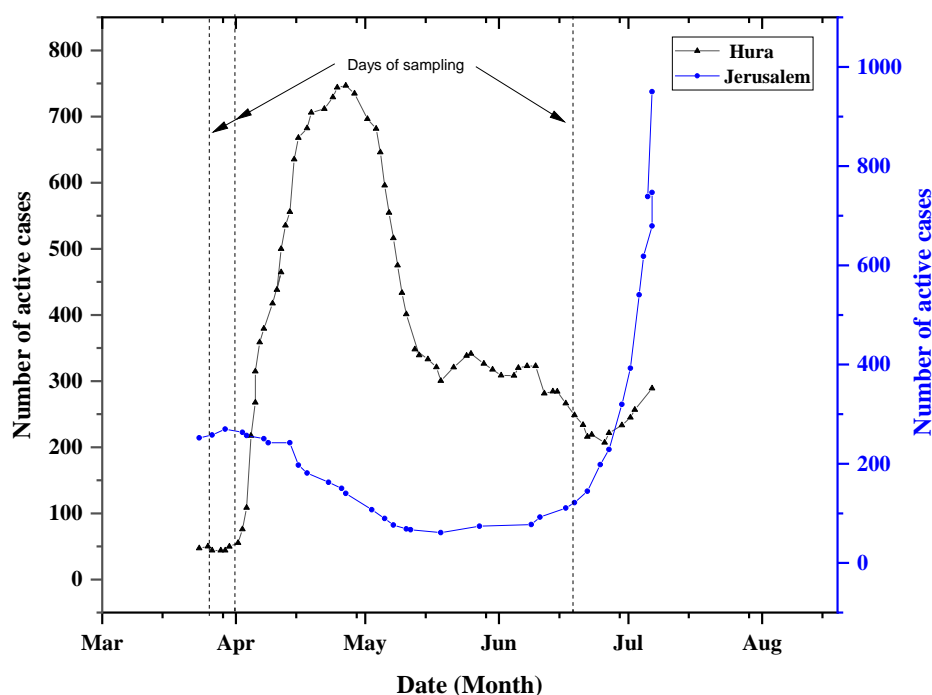

**Figure S1. Number of COVID-19 active cases in the areas served by the targeted WWTPs.<sup>3</sup> Numbers of cases are per 100,000 residents. Number of active cases is calculated by removing deaths and recoveries from total cases.**

**Table S1. Characteristics of the Targeted wastewater treatment plants (WWTPs) on the days of sampling.**

| WWTP        | sampling date                | average temperature (°C) | wastewater collection point | BOD (mg·L <sup>-1</sup> ) | COD (mg·L <sup>-1</sup> ) | TSS (mg·L <sup>-1</sup> ) | residual chlorine (mg·L <sup>-1</sup> ) | HRT (h)* |
|-------------|------------------------------|--------------------------|-----------------------------|---------------------------|---------------------------|---------------------------|-----------------------------------------|----------|
| Shoket WWTP | 21 <sup>st</sup> April, 2020 | 22°C                     | influent                    | -                         | -                         | 434                       | -                                       |          |
|             |                              |                          | primary sedimentation       | 260                       | 1194                      | 290                       | -                                       | 3.5      |
|             |                              |                          | secondary sedimentation     | 5                         | 62                        | 6                         | -                                       | 8.5      |
|             |                              |                          | sand filtration             | 5                         | 61                        | 3                         | -                                       | 3.5      |
|             |                              |                          | chlorine disinfection       | -                         | -                         | -                         | 2.3                                     | 0.5      |
|             | 27 <sup>th</sup> April, 2020 | 22°C                     | influent                    | -                         | -                         | 422                       | -                                       |          |
|             |                              |                          | primary sedimentation       | 360                       | 613                       | 300                       | -                                       | 3.5      |
|             |                              |                          | secondary sedimentation     | 4                         | 46                        | 2                         | -                                       | 8.5      |
|             |                              |                          | sand filtration             | -                         | -                         | -                         | -                                       | 3.5      |
|             |                              |                          | chlorine disinfection       | -                         | -                         | -                         | 1.7                                     | 0.5      |
|             | 14 <sup>th</sup> July, 2020  | 29°C                     | influent                    | 260                       | 357                       | 266                       | -                                       |          |
|             |                              |                          | primary sedimentation       | 240                       | 294                       | 160                       | -                                       | 3.5      |
|             |                              |                          | secondary sedimentation     | 1                         | 43                        | 8                         | -                                       | 8.5      |
|             |                              |                          | sand filtration             | 5                         | 44                        | 3                         | -                                       | 3.5      |
|             |                              |                          | chlorine disinfection       | -                         | -                         | -                         | 2.2                                     | 0.5      |
| Sorek WWTP  | 21 <sup>st</sup> April, 2020 | 22°C                     | influent                    | 373                       | 812                       | 570                       | -                                       |          |
|             |                              |                          | primary sedimentation       | 232                       | 359                       | 117                       | -                                       | 1.5      |
|             |                              |                          | secondary sedimentation     | 10                        | 76                        | 11                        | -                                       | 7.9      |
|             |                              |                          | sand filtration             | --                        | --                        | --                        | --                                      |          |
|             |                              |                          | chlorine disinfection       | -                         | -                         | -                         | -                                       |          |
|             | 27 <sup>th</sup> April, 2020 | 22°C                     | influent                    | 485                       | 885                       | 562                       | -                                       |          |
|             |                              |                          | primary sedimentation       | 329                       | 519                       | 221                       | -                                       | 1.5      |
|             |                              |                          | secondary sedimentation     | 17                        | 61                        | 18                        | -                                       | 7.9      |
|             |                              |                          | sand filtration             | --                        | --                        | --                        | --                                      |          |
|             |                              |                          | chlorine disinfection       | -                         | -                         | -                         | -                                       |          |
|             | 14 <sup>th</sup> July, 2020  | 29°C                     | influent                    | 447                       | 963                       | 788                       | -                                       |          |
|             |                              |                          | primary sedimentation       | 135                       | 421                       | 155                       | -                                       | 1.5      |
|             |                              |                          | secondary sedimentation     | 18                        | 113                       | 122                       | -                                       | 7.9      |
|             |                              |                          | sand filtration             | --                        | --                        | --                        | --                                      |          |
|             |                              |                          | chlorine disinfection       | -                         | -                         | -                         | -                                       |          |

WWTP characteristics were retrieved from the plants' operators. '-' → data not available; '--' → treatment process does not exist in the plant; COD: Chemical Oxygen Demand; BOD: Biological Oxygen Demand; TSS: Total Suspended Solids; HRT: Hydraulic Retention Time (\*approximate average timing).

## C. Sample processing

### C1. Sewage sampling and concentration

The volumes of collected WW samples along with their corresponding concentration factors (wherever applicable) are given in Table S2. The complete method of WW sample collection to RT-PCR detection of SARS-CoV, as followed in the present work, is pictorially presented in a stepwise manner in Figure S2.

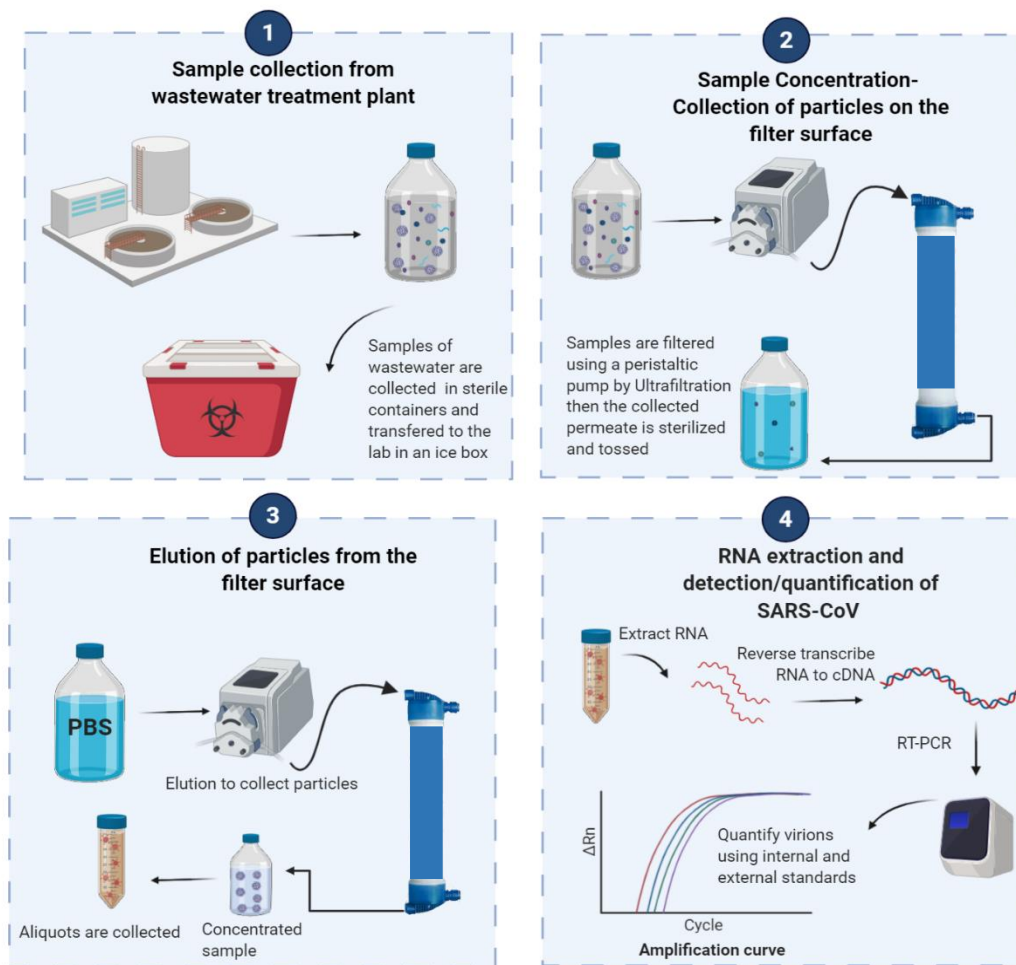

**Figure S2. Method used in quantifying SARS-CoV-2 in WW.** All components of the figure have been made using BioRender<sup>4</sup>. *Step 1* – WW collections in sterilized plastic containers, *Step 2* – concentration/volume reduction by ultrafiltration, *Step 3*– elution by PBS (phosphate buffer solution) to collect the accumulated particles on the membrane surface, *Step 4* – RNA extraction and detection of SARS-CoV by RT-PCR.

PBS was chosen based on a previous study in which viral particles were concentrated from large volumes<sup>5</sup>. Other studies are using Tween, glycine, Sodium polyphosphate (NaPP) or beef extract in the elution solution <sup>6</sup> which can be tested in future experiments.

**Table S2. Concentrations of WW samples before and after concentrating by ultrafiltration method.**

| WWTP                    | sampling date                | wastewater collection point | initial volume (L) | final volume (L) | concentration factor |
|-------------------------|------------------------------|-----------------------------|--------------------|------------------|----------------------|
| Sorek WWTP              | 21 <sup>st</sup> April, 2020 | influent                    | 0.2                | 0.2              | 1                    |
|                         |                              | primary sedimentation       | 3.8                | 0.22             | 17.3                 |
|                         |                              | secondary sedimentation     | 8.5                | 0.22             | 38.6                 |
|                         |                              | sand filtration             | --                 | -                | --                   |
|                         |                              | chlorine disinfection       | 8.5                | 0.22             | 38.6                 |
|                         | 27 <sup>th</sup> April, 2020 | influent                    | 0.2                | 0.2              | 1                    |
|                         |                              | primary sedimentation       | 3.5                | 0.22             | 15.9                 |
|                         |                              | secondary sedimentation     | 8.5                | 0.22             | 38.6                 |
|                         |                              | sand filtration             | --                 | --               | --                   |
|                         |                              | chlorine disinfection       | 8.5                | 0.22             | 38.6                 |
|                         | 14 <sup>th</sup> July, 2020  | influent                    | 0.2                | 0.2              | 1                    |
|                         |                              | primary sedimentation       | 9.5                | 0.27             | 35.2                 |
| secondary sedimentation |                              | 9.5                         | 0.25               | 38               |                      |
| sand filtration         |                              | --                          | --                 | --               |                      |
| chlorine disinfection   |                              | 9.5                         | 0.25               | 38               |                      |
| Shoket WWTP             | 21 <sup>st</sup> April, 2020 | influent                    | 0.2                | 0.2              | 1                    |
|                         |                              | primary sedimentation       | 3.5                | 0.22             | 15.9                 |
|                         |                              | secondary sedimentation     | 8.5                | 0.22             | 38.6                 |
|                         |                              | sand filtration             | 8.5                | 0.22             | 38.6                 |
|                         |                              | chlorine disinfection       | 8.5                | 0.22             | 38.6                 |
|                         | 27 <sup>th</sup> April, 2020 | influent                    | 0.2                | 0.2              | 1                    |
|                         |                              | primary sedimentation       | 3.5                | 0.22             | 15.9                 |
|                         |                              | secondary sedimentation     | 8.5                | 0.22             | 38.6                 |
|                         |                              | sand filtration             | 8.5                | 0.22             | 38.6                 |
|                         |                              | chlorine disinfection       | 8.5                | 0.22             | 38.6                 |
|                         | 14 <sup>th</sup> July, 2020  | influent                    | 0.2                | 0.2              | 1                    |
|                         |                              | primary sedimentation       | 9.5                | 0.22             | 43.2                 |
| secondary sedimentation |                              | 9.5                         | 0.28               | 33.9             |                      |
| sand filtration         |                              | 9.5                         | 0.22               | 43.2             |                      |
| chlorine disinfection   |                              | 9.5                         | 0.26               | 36.5             |                      |

'-' → data not available; '--' → treatment process does not exist in the plant.

## C2. Quantification of SARS-CoV to copy number per L

For the calibration curve, we used a plasmid that contains the full SARS-CoV-2 N gene sequence as it isolated from Wuhan-Hu-1, complete genome (GenBank: NC\_045512.2). We prepared serial dilutions for the plasmid and calculations for the copy number. RT-PCR amplification were performed according to user manual recommendation using CDC's N1 primers and probe set. In parallel to N1 test, each RNA sample was spiked with a N gene in known concentration to rule out any inhibitors affect to the enzymatic reaction. Second quality control was done with adding MS2 phage to the lysis buffer step for RNA extraction indication (See Table s3 for RT-PCR results). To create standard curve, we performed linear regression between the log copy number and the Ct values from the RT-PCR (figure S3). Copy number presented in the calibration graph were divided by two in order to parallel it to RNA quantification. Using the linear equation, we calculated copy number of N1 gene in sewage samples presented in this study.

**Table S3: Primers and probes used for RT-qPCR.**

| primer/ probe <sup>7,8</sup> | sequence (5'→3')                              | database accession number | position      | concentration (nM) |
|------------------------------|-----------------------------------------------|---------------------------|---------------|--------------------|
| MS2_Forward                  | TGCTCGCGGATACCCG                              | V00642                    | 3169-3184     | 300                |
| MS2_Reverse                  | AACTTGCGTTCTCGAGCGAT                          |                           | 3229-3210     | 300                |
| MS2_Probe                    | [VIC]-<br>ACCTCGGGTTTCCGTCTTGCTCGT-<br>[BHQ1] |                           | 3186-3209     | 200                |
| N1_Forward                   | GACCCCAAATCAGCGAAAT                           | NC_045512.2               | 28287 - 28306 | 500                |
| N1_Reverse                   | TCTGG TACTGCCAGTTGAATCTG                      |                           | 28335 - 28358 | 500                |
| N1_Probe                     | [FAM]-<br>ACCCCGCATTACGTTTGGTGGACC-<br>[BHQ1] |                           | 28309 - 28332 | 125                |

\*TaqMan® probes are labelled at the 5'-end with the reporter molecule 6-carboxyfluorescein (FAM) or 2'-chloro-7'phenyl-1,4-dichloro-6-carboxy-fluorescein (VIC) and with the quencher, Black Hole Quencher 1 (BHQ-1).

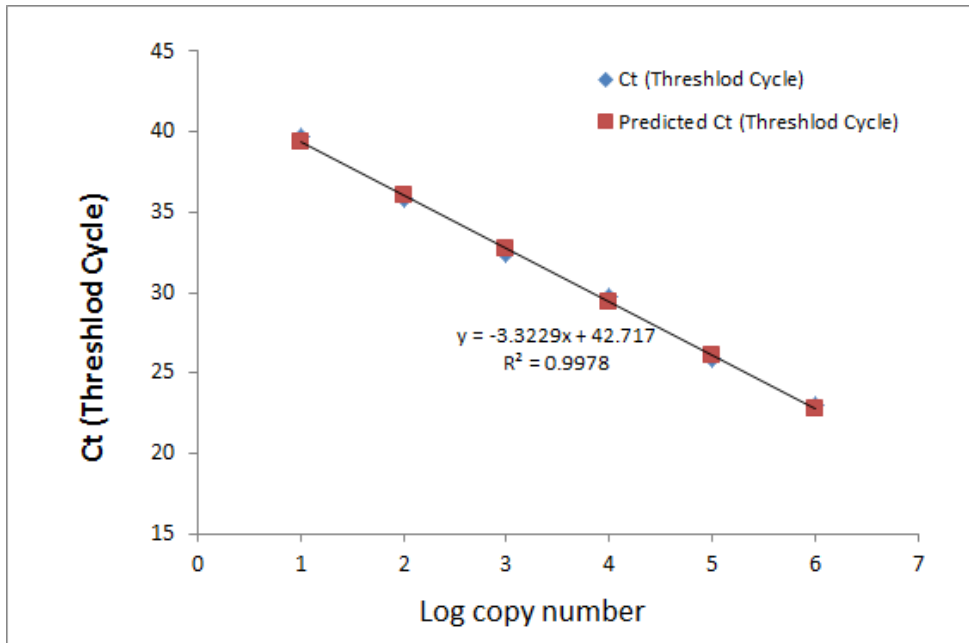

**Figure S3: calibration curve for CDC's N1 primers and probe set.** Linear regression between the log copy number of SARA-CoV-2 N gene plasmid and the threshold cycle (Ct) values from the RT-PCR amplification.

**Table S3: Ct values for detecting SARS-CoV-2 in WW samples.**

| WWTP   | date                         | wastewater collection point | concentration factor | N1    | MS2   | Spike N gene |
|--------|------------------------------|-----------------------------|----------------------|-------|-------|--------------|
| Shoket | 21 <sup>st</sup> April, 2020 | influent                    | 1.0                  | 37.34 | 29.47 | 28.86        |
|        |                              | primary sedimentation       | 15.9                 | 37.35 | 29.95 | 27.98        |
|        |                              | secondary sedimentation     | 38.6                 | 35.58 | 28.82 | 26.54        |
|        |                              | sand filtration             | 38.6                 | -     | 29.37 | 26.35        |
|        |                              | chlorine disinfection       | 38.6                 | -     | 29.47 | 27.04        |
|        | 27 <sup>th</sup> April, 2020 | influent                    | 1.0                  | 34.41 | 30.24 | 26.31        |
|        |                              | primary sedimentation       | 15.9                 | 33.58 | 30.61 | 26.91        |
|        |                              | secondary sedimentation     | 38.6                 | 34.51 | 29.53 | 25.87        |
|        |                              | sand filtration             | 38.6                 | 35.97 | 29.61 | 26.41        |
|        |                              | chlorine disinfection       | 38.6                 | -     | 29.31 | 26.21        |
|        | 14 <sup>th</sup> July, 2020  | influent                    | 1.0                  | 35.42 | 28.66 | 30.1         |
|        |                              | primary sedimentation       | 43.2                 | 31.47 | 30.36 | 26.15        |
|        |                              | secondary sedimentation     | 33.9                 | -     | 30.07 | 26.11        |
|        |                              | sand filtration             | 43.2                 | -     | 29.89 | 26.08        |
|        |                              | chlorine disinfection       | 36.5                 | -     | 29.68 | 26.33        |
| Sorek  | 21 <sup>st</sup> April, 2020 | influent                    | 1.0                  | -     | 29.54 | 25.94        |
|        |                              | primary sedimentation       | 17.3                 | 34.97 | 30.33 | 26.31        |
|        |                              | secondary sedimentation     | 38.6                 | -     | 29.98 | 26.24        |
|        |                              | sand filtration             | --                   | --    | --    | --           |
|        |                              | chlorine disinfection       | 38.6                 | -     | 29.33 | 26.65        |
|        | 27 <sup>th</sup> April, 2020 | influent                    | 1.0                  | -     | 29.96 | 26.17        |
|        |                              | primary sedimentation       | 15.9                 | 34.16 | 29.74 | 26.71        |
|        |                              | secondary sedimentation     | 38.6                 | 36.59 | 30.11 | 25.87        |
|        |                              | sand filtration             | --                   | --    | --    | --           |
|        |                              | chlorine disinfection       | 38.6                 | -     | 29.9  | 26.84        |
|        | 14 <sup>th</sup> July, 2020  | influent                    | 1.0                  | 34.7  | 28.87 | 29.89        |
|        |                              | primary sedimentation       | 35.2                 | 32.83 | 29.45 | 25.43        |
|        |                              | secondary sedimentation     | 38.0                 | 35.77 | 29.81 | 26.31        |
|        |                              | sand filtration             | --                   | --    | --    | --           |
|        |                              | chlorine disinfection       | 38.0                 | 37.14 | 29.03 | 26.09        |

‘-’ → data not available; ‘--’ → treatment process does not exist in the plant.



## D. References

- (1) Fresenius Medical Care. FX high-flux and FX low-flux dialyzers <https://www.freseniusmedicalcare.asia/en/healthcare-professionals/hemodialysis/dialyzers/fx-high-and-low-flux-dialyzers/>.
- (2) Obayomi, O.; Bernstein, N.; Edelstein, M.; Vonshak, A.; Ghazayarn, L.; Ben-Hur, M.; Tebbe, C. C.; Gillor, O. Importance of Soil Texture to the Fate of Pathogens Introduced by Irrigation with Treated Wastewater. *Sci. Total Environ.* **2019**, *653* (November), 886–896. <https://doi.org/10.1016/j.scitotenv.2018.10.378>.
- (3) Taub Center. Three sectoral differences between the first and second wave of morbidity <http://taubcenter.org.il/he/blog/heb-three-sectoral-differences-between-the-first-and-second-waves/>.
- (4) BioRender [www.biorender.com](http://www.biorender.com).
- (5) Qiu, Y.; Lee, B. E.; Ruecker, N. J.; Neumann, N.; Ashbolt, N.; Pang, X. A One-Step Centrifugal Ultrafiltration Method to Concentrate Enteric Viruses from Wastewater. *J. Virol. Methods* **2016**, *237*, 150–153. <https://doi.org/10.1016/j.jviromet.2016.09.010>.
- (6) Farkas, K.; McDonald, J. E.; Malham, S. K.; Jones, D. L. Two-Step Concentration of Complex Water Samples for the Detection of Viruses. *Methods Protoc.* **2018**, *1* (3), 1–6. <https://doi.org/10.3390/mps1030035>.
- (7) CDC. *2019-Novel Coronavirus ( 2019-NCoV ) Real-Time RRT-PCR Panel Primers and Probes Note : Oligonucleotide Sequences Are Subject to Future Changes as the 2019-Novel Coronavirus*; 2020; p 2.
- (8) Dreier, J.; Störmer, M.; Kleesiek, K. Use of Bacteriophage MS2 as an Internal Control in Viral Reverse Transcription-PCR Assays. *J. Clin. Microbiol.* **2005**, *43* (9), 4551–4557. <https://doi.org/10.1128/JCM.43.9.4551-4557.2005>.
